# Supplementary material for: Digital intervention increases influenza vaccination rates for people with diabetes in a decentralized randomized trial
Source: PubMed Central journal article supplement (PMC8448887; doi:10.1038/s41746-021-00508-2), 2021-09-17

## Supplementary Note 1

Digital Diabetes Interventions: Examples of messages sent to participants in the PWD-I cohort:  
a) First message:

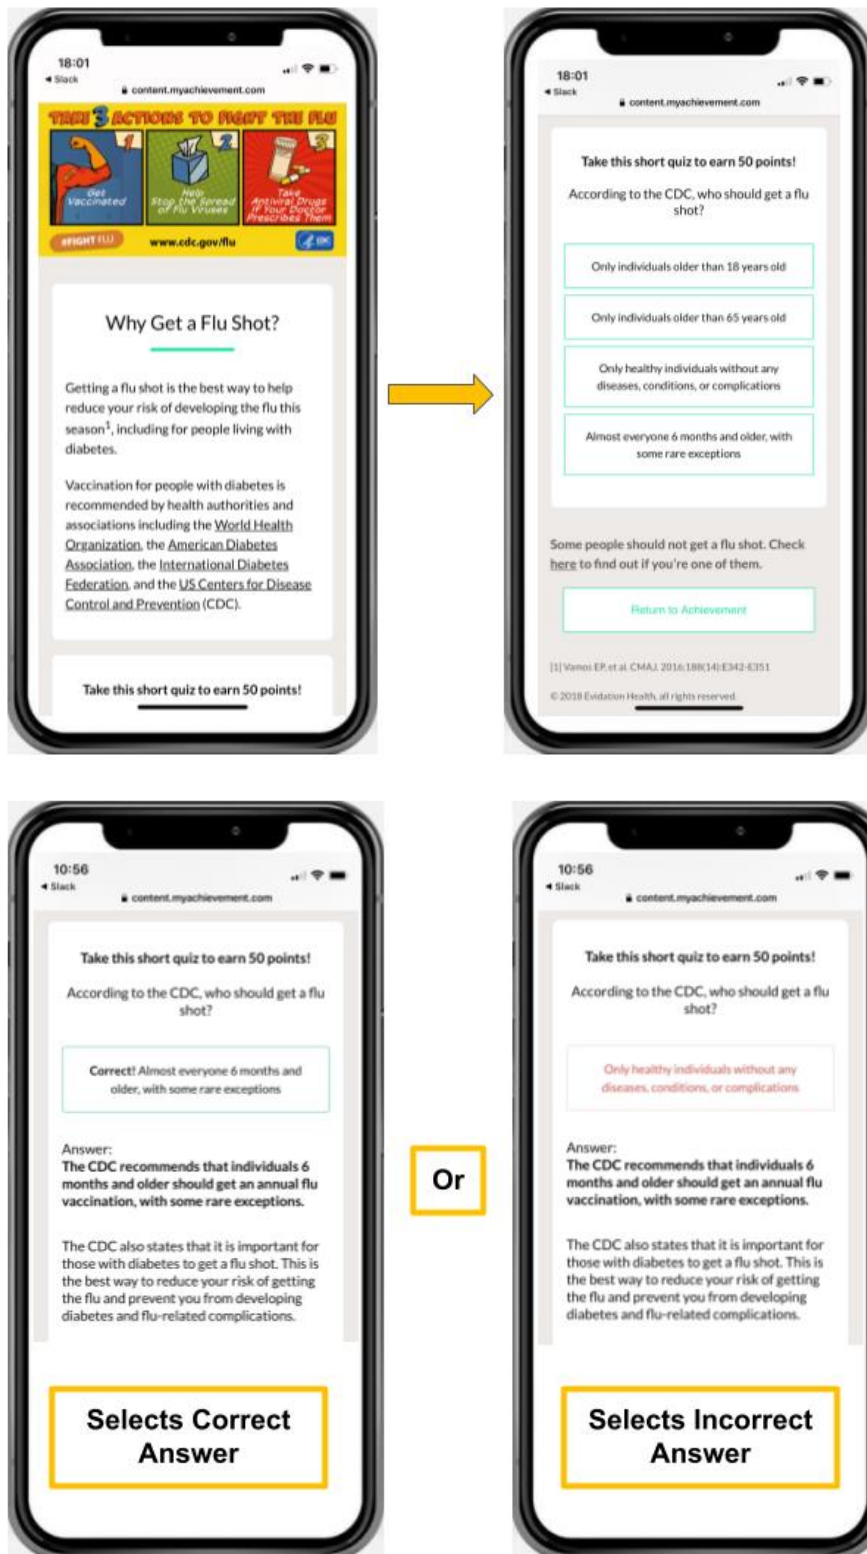

b) Third message:

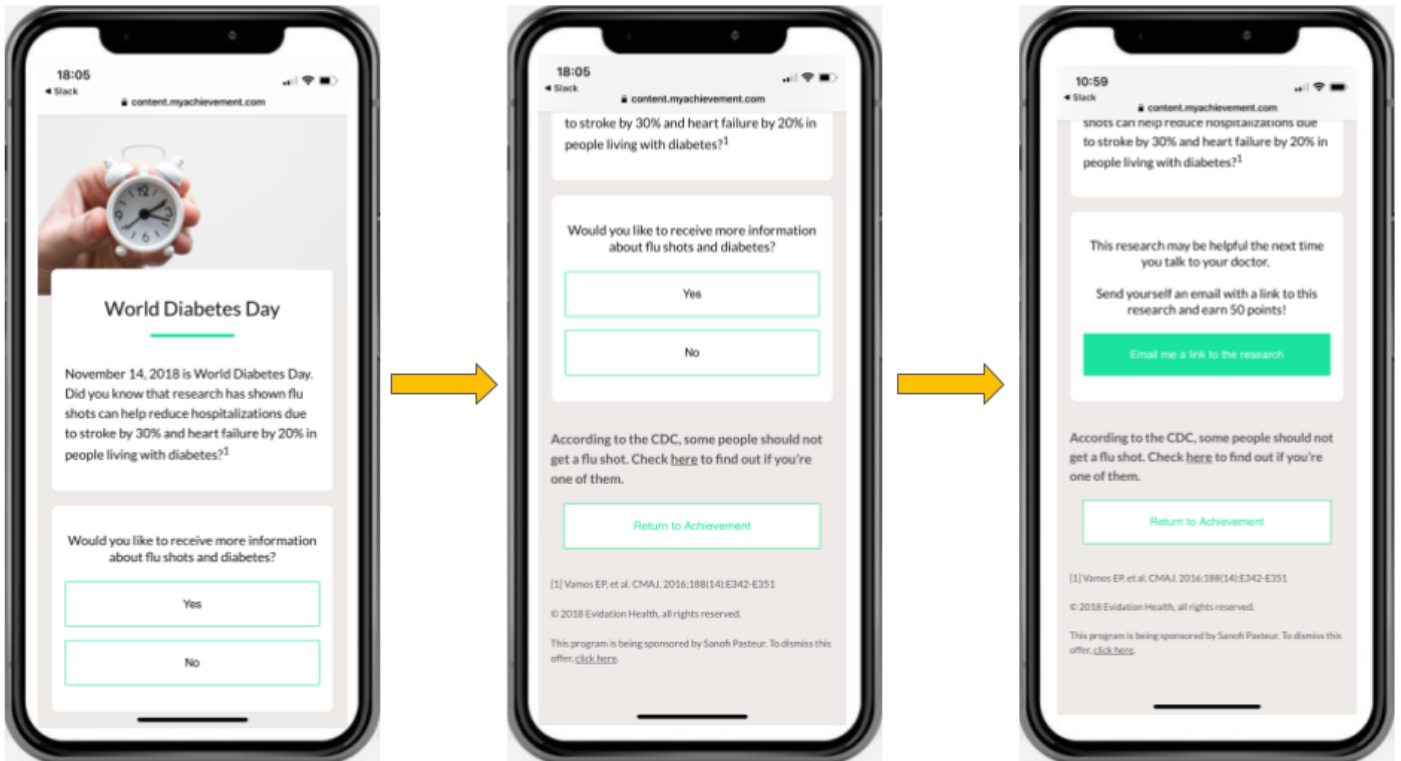

c) Fifth message:

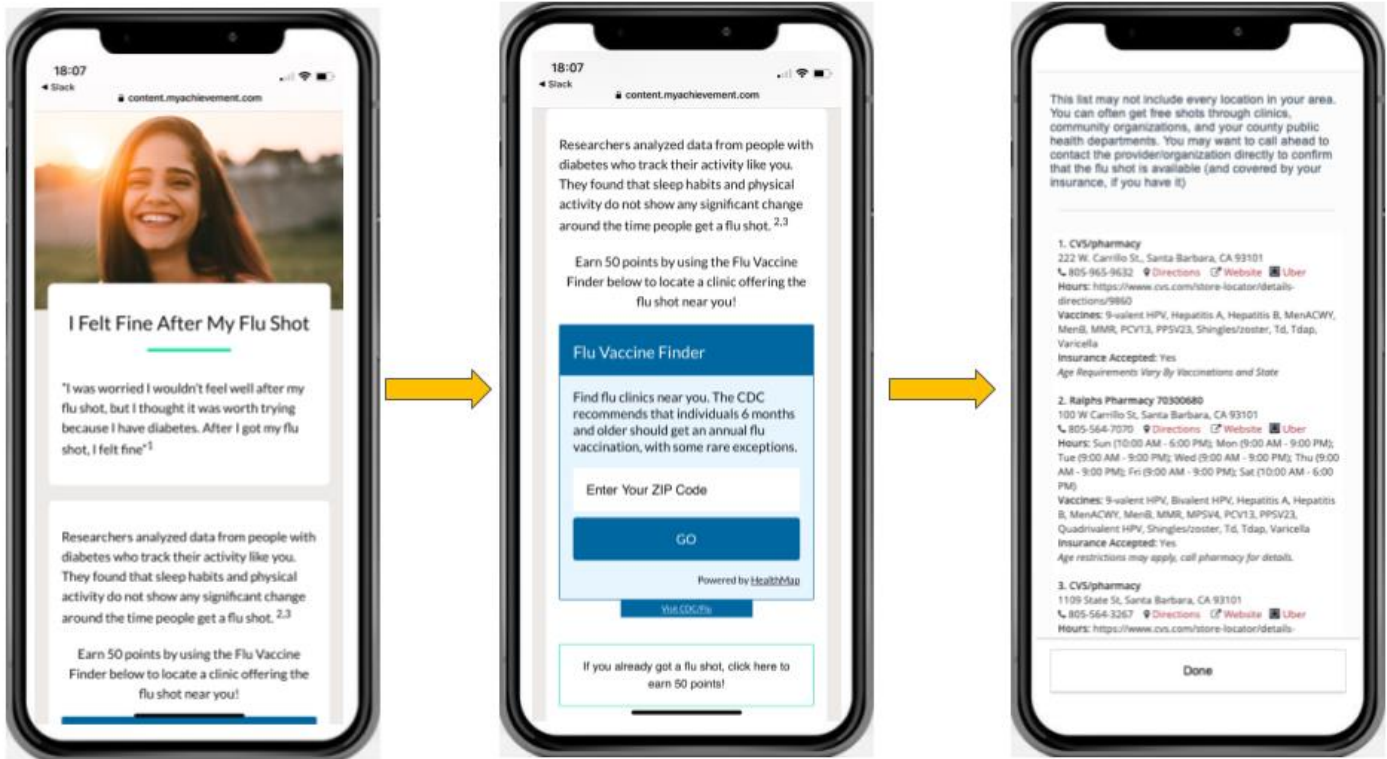

Supplement: 41746_2021_508_MOESM1_ESM.pdf [file 41746_2021_508_MOESM1_ESM.pdf]
